# Supplementary material
Source: MDPI journal article supplement (https://www.mdpi.com/2312-7481/9/1/14)
Supplement: s1 [file s1]

## Supplementary Materials

### Crystal structures and magnetic properties of diaquatetrapyridinenickel(II) and diaquatetrapyridinecobalt(II) complexes

Hiroshi Sakiyama <sup>1,\*</sup>, Yuya Yamamoto <sup>1</sup>, Ryusei Hoshikawa <sup>1</sup> and Ryoji Mitsuhashi <sup>2</sup>

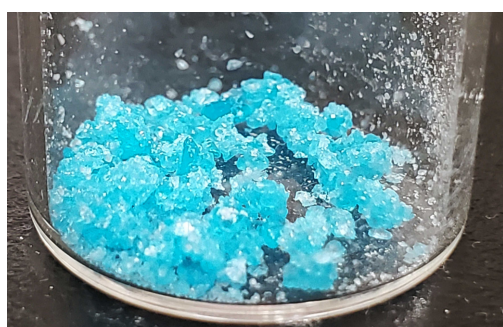

(a)

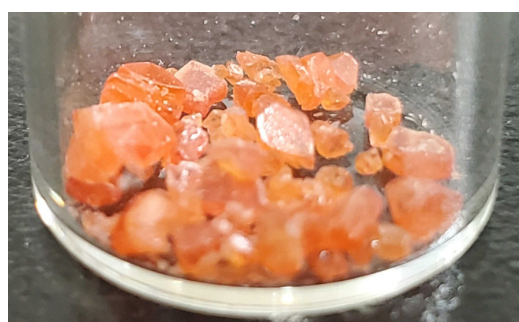

(b)

**Figure S1.** Crystals of 1 and 2: (a) [Ni(H<sub>2</sub>O)<sub>2</sub>(py)<sub>4</sub>][BPh<sub>4</sub>]<sub>2</sub>·4py (**1**); (b) [Co(H<sub>2</sub>O)<sub>2</sub>(py)<sub>4</sub>][BPh<sub>4</sub>]<sub>2</sub>·4py (**2**).
